# Supplementary figures and images for: Activation of Sonic hedgehog signaling in neural progenitor cells promotes glioma development in the zebrafish optic pathway
Source: PubMed Central journal article supplement — Oncogenesis. 2014 Mar 31;3(3):e96–. doi: 10.1038/oncsis.2014.10 (PMC4038393; doi:10.1038/oncsis.2014.10), 2014-03-31

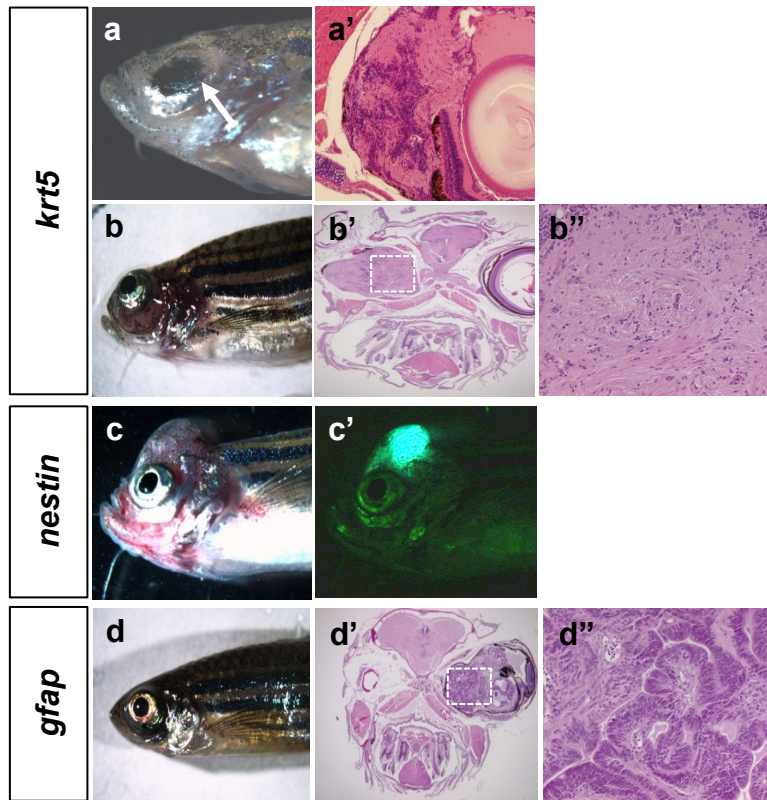

Supplementary Figure 1

Supplement: oncsis201410x1.pdf [file oncsis201410x1.pdf]

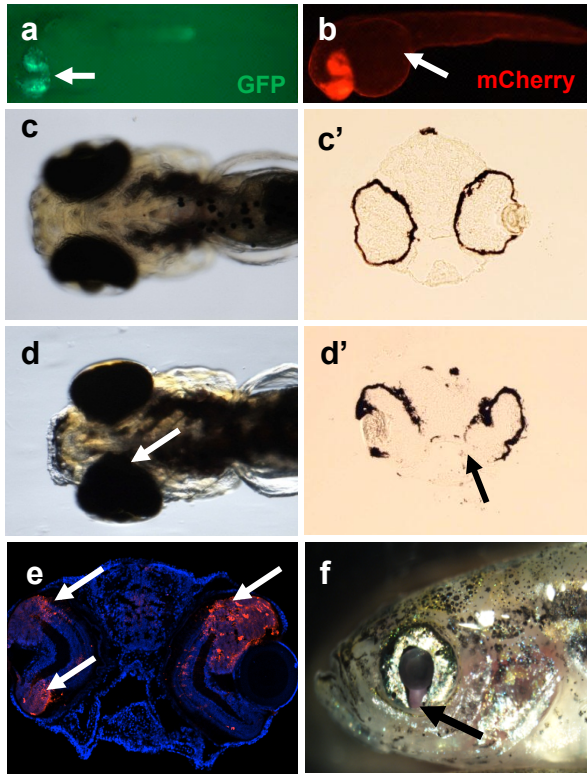

Supplementary Figure 2

Supplement: oncsis201410x2.pdf [file oncsis201410x2.pdf]

a

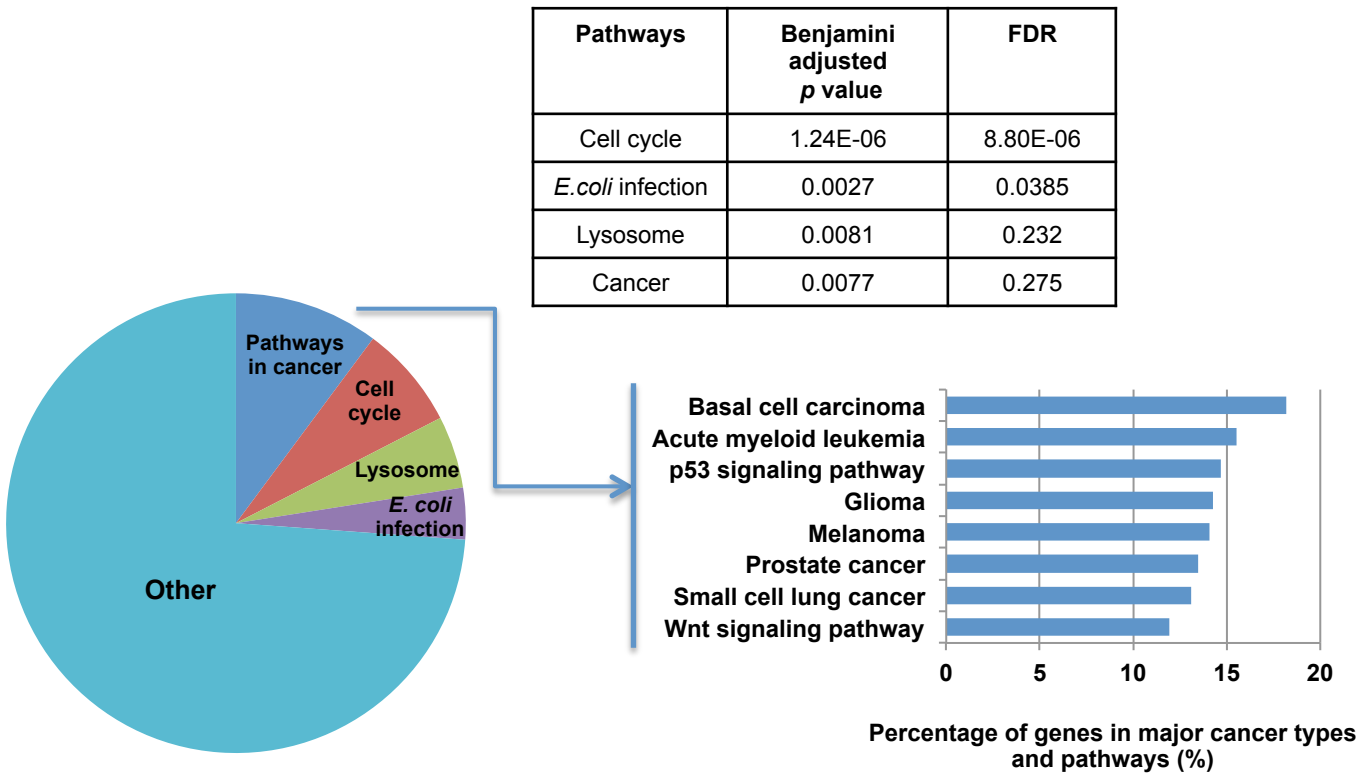

f

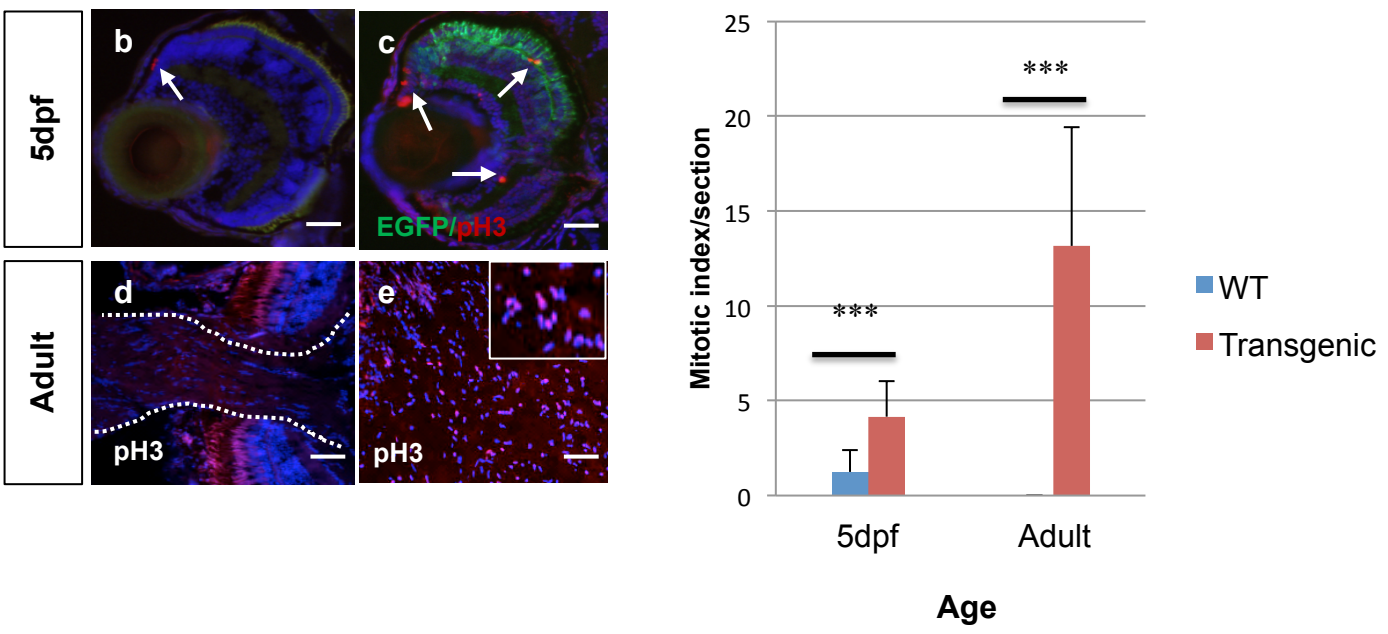

Supplementary Figure 3

Supplement: oncsis201410x3.pdf [file oncsis201410x3.pdf]

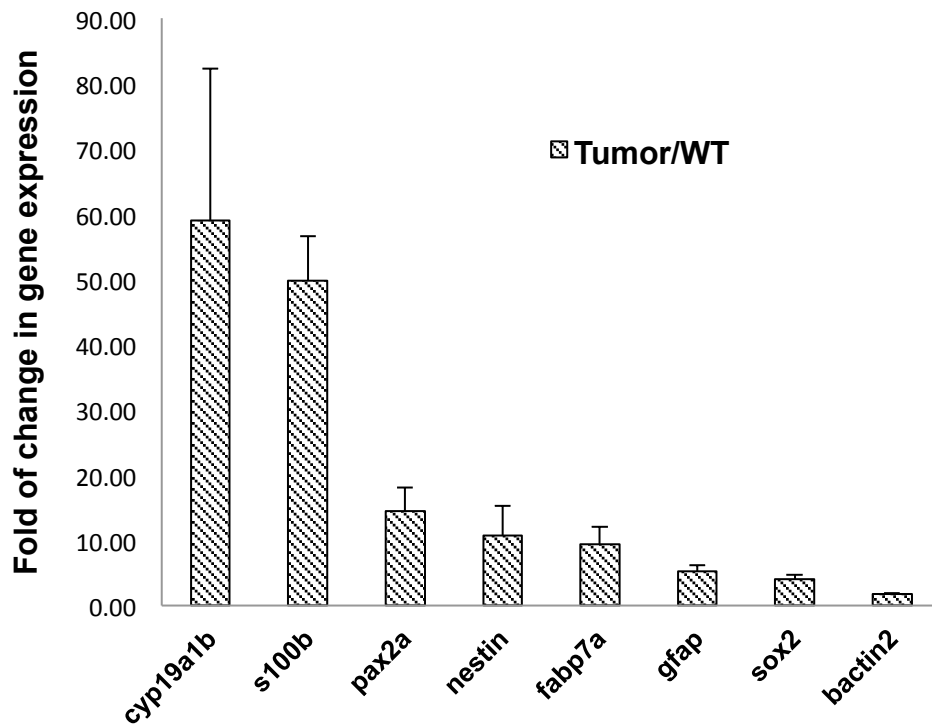

Supplementary Figure 4

Supplement: oncsis201410x4.pdf [file oncsis201410x4.pdf]

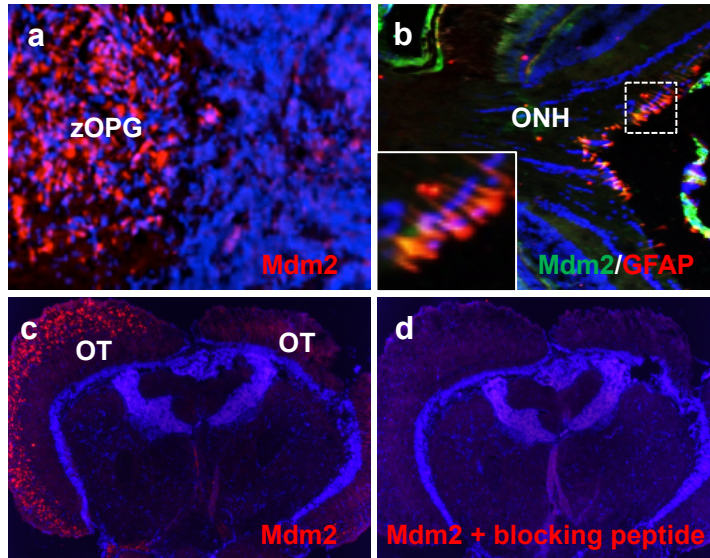

Supplementary Figure 5

Supplement: oncsis201410x5.pdf [file oncsis201410x5.pdf]
